# Supplementary material
Source: PubMed Central journal article supplement (PMC4561185)
Supplement: NIHMS709538-supplement-1.pdf [file NIHMS709538-supplement-1.pdf]

# Supplemental Figure 1

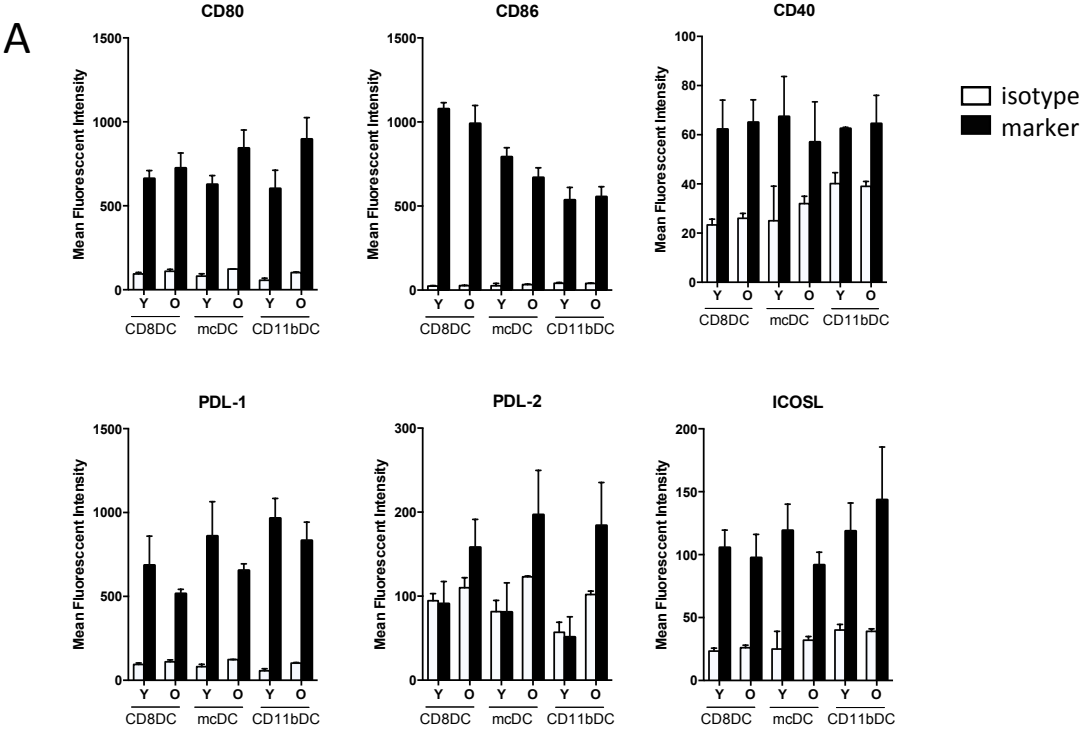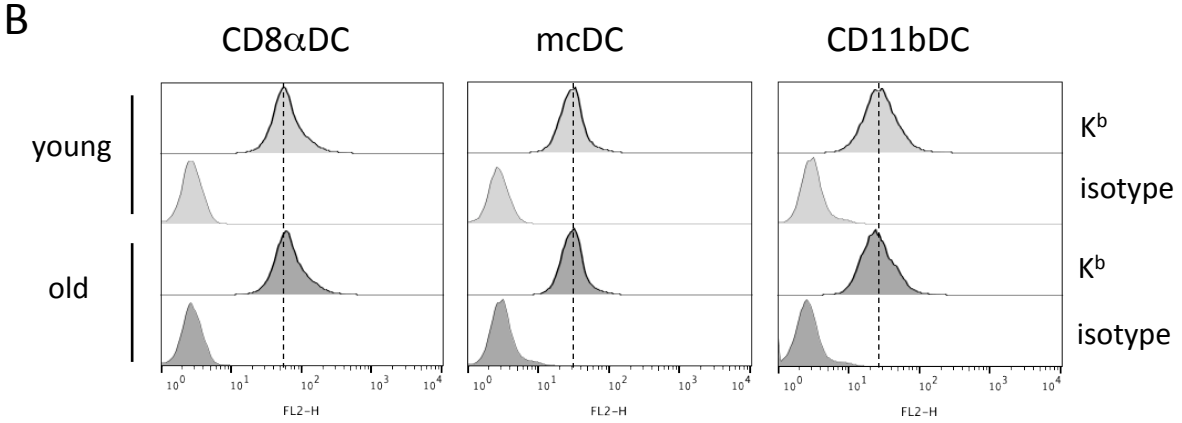

**Supplemental figure 1. Surface marker expression on young and aged DCs.** Splens for young and aged mice were stained for lineage, CD11c, MHCII, CD8, CD11b, and indicated markers or appropriate isotype controls and analyzed by flow cytometry. **A.** Mean fluorescent intensity of indicated marker (black bars) and appropriate isotype controls (white bar). Data are expressed as mean  $\pm$  s.e.m. with n=4-5. **B.** Representative intensity data for K<sup>b</sup> and isotype control staining in indicated splenic DC subpopulations of young and aged mice.

# Supplemental Figure 2

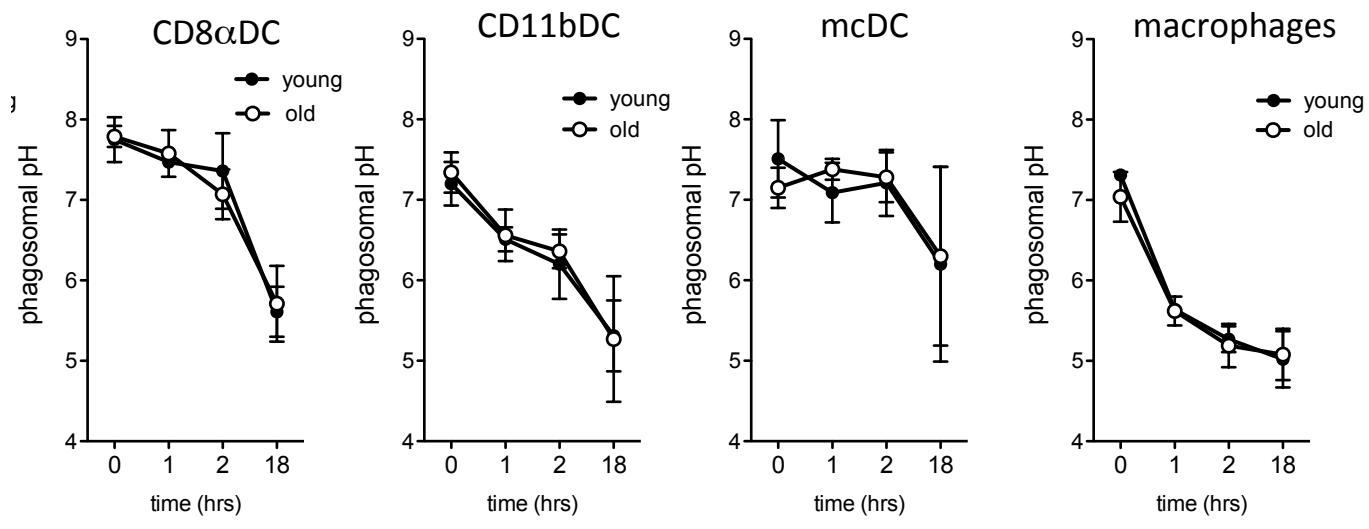

### Supplemental figure 2. Comparable endosomal acidification rate in young and aged DCs.

Young (white circles) and aged (black circles) DCs were cultured with dually-labeled beads (pH sensitive FITC and pH insensitive FluoProbes 647) and analyzed at different time points by flow cytometry, using a gating FCS/SSC selective for cells containing one bead. The ratio of the mean fluorescence intensity (MFI) emission between the two dyes was determined and compared with a standard curve (ranging from pH 5.5 to 8). Data are expressed as mean  $\pm$  s.e.m. with n=3.

## Supplemental figure 3

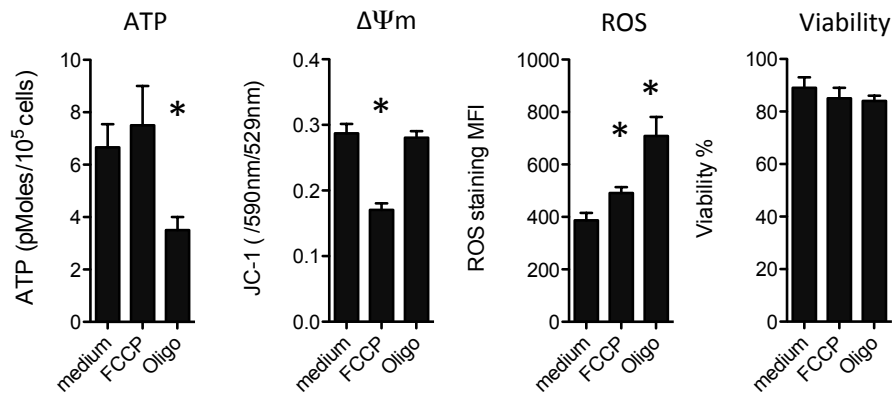

### Supplemental figure 3. Effect of FCCP and Oligomycin on viability and mitochondrial function.

Young DCs were cultured for 4 hrs in the presence of vehicle, FCCP, or oligomycin after which intracellular ATP levels, mitochondrial membrane potential ( $\Delta\Psi_m$ ), ROS production, and viability were determined. One (out of 3) experiments is shown. Data are expressed as mean  $\pm$  s.e.m. with n=3. \*, p<0.05.
